# Supplementary material
Source: publisher site journal article supplement (https://www.spandidos-publications.com/7913/downloadSupplementary)
Supplement: Supplementary file 1 [file downloadSupplementary]

## Sheet: Canonical pathways
Comparative analysis results (DE groups: AGE vs Control; Comparison groups: Cor-tex vs Hippocampus) from ingenuity pathway analysis
© 2000-2024 QIAGEN. All rights reserved.	z-score	z-score	BH pvalue	BH pvalue
Canonical Pathways	CX_Global (AGE vs controls) - 2023-07-01 03:17 PM	Hippo_Global (AGE vs controls) - 2023-07-01 03:19 PM	CX_Global (AGE vs controls) - 2023-07-01 03:17 PM	Hippo_Global (AGE vs controls) - 2023-07-01 03:19 PM
Epithelial Adherens Junction Signaling	0.707	0.784	2.0148	8.77143
Synaptogenesis Signaling Pathway	2.646	0.343	0.743275	8.77143
Sertoli Cell Germ Cell Junction Signaling Pathway (Enhanced)	2.324	-0.853	5.30562	4.00122
Reelin Signaling in Neurons	2.236	-0.471	1.31351	6.50742
Sertoli Cell-Sertoli Cell Junction Signaling	3.153	0.832	6.58428	0.944648
RHOGDI Signaling	-2.449	0.894	1.82755	5.65625
Axonal Guidance Signaling	N/A	N/A	1.68828	5.56878
CLEAR Signaling Pathway	-2.236	1.616	0.453908	6.50742
14-3-3-mediated Signaling	0	-1.387	1.88821	4.86572
Actin Cytoskeleton Signaling	2.121	-1.4	1.6485	5.05088			Results from IPA comparative analysis between differentially expressed proteins in the cortex (CX) and hippocampus (Hippo) of AGE fed mice which includes canonical pathway analysis (Sheet: Canonical pathways), upstream regulator analysis (Sheet: Upstream regulators), and disease and function analysis (Sheet: Behavior prediction). The tables include one descriptor column and four quantitative colu…
RHOA Signaling	1.633	-1	1.47547	4.96583
mTOR Signaling	2	-1.789	0.658324	5.77234
Remodeling of Epithelial Adherens Junctions	N/A	0.378	1.24065	5.18441
Autophagy	0	1.706	1.47547	4.93673
Sirtuin Signaling Pathway	2	0.626	0.439536	5.79486
fMLP Signaling in Neutrophils	N/A	0.471	0.476296	5.65625
Signaling by Rho Family GTPases	1.342	-1.706	0.715037	5.34906
Thrombin Signaling	N/A	-0.943	0.412712	5.56878
RAC Signaling	1	-0.728	0.972045	4.97338
Opioid Signaling Pathway	1.342	1.732	0.460186	5.44588
SNARE Signaling Pathway	N/A	2.524	0.235226	5.56878
Mitochondrial Dysfunction	0	1.095	0.879975	4.84234
Estrogen Receptor Signaling	1.667	1.633	1.29243	4.33456
Glutaminergic Receptor Signaling Pathway (Enhanced)	1.89	1.671	0.72806	4.86572
Protein Kinase A Signaling	0.447	1.616	0.374621	4.9675
CDK5 Signaling	-0.816	0.577	2.58712	2.69177
Chemokine Signaling	N/A	0.277	0.72806	4.53846
Regulation of Actin-based Motility by Rho	2.236	-1.069	1.6002	3.65505
Clathrin-mediated Endocytosis Signaling	N/A	N/A	0.453908	4.75409
Ephrin Receptor Signaling	2	0.229	0.715037	4.46841
Apoptosis Signaling	1	1.069	0.907205	4.09322
Role of NFAT in Cardiac Hypertrophy	1.342	1.528	0.619995	4.32928
Cholecystokinin/Gastrin-mediated Signaling	N/A	0.5	0.281079	4.65083
Aldosterone Signaling in Epithelial Cells	N/A	-0.707	1.84557	2.98754
Virus Entry via Endocytic Pathways	N/A	N/A	0	4.68314
GM-CSF Signaling	N/A	0	0.175889	4.46841
Fcγ Receptor-mediated Phagocytosis in Macrophages and Monocytes	N/A	0.832	0.654187	3.93822
Germ Cell-Sertoli Cell Junction Signaling	N/A	N/A	2.25066	2.25787
Integrin Signaling	1.89	-0.728	1.17772	3.26394
AMPK Signaling	0.378	0.277	2.0148	2.38069
Huntington's Disease Signaling	1.134	1.667	1.06975	3.32385
Actin Nucleation by ARP-WASP Complex	N/A	-1.387	0.374621	3.97811
Semaphorin Neuronal Repulsive Signaling Pathway	1.414	0.277	2.07233	2.27307
UVC-Induced MAPK Signaling	N/A	0	0	4.20801
IL-3 Signaling	N/A	0	0.159373	3.99375
Gap Junction Signaling	N/A	N/A	1.24927	2.81317
Apelin Endothelial Signaling Pathway	0	0.832	0.715037	3.30382
G Beta Gamma Signaling	N/A	1.291	0.252519	3.69944
CXCR4 Signaling	1.342	0.258	0.864565	3.06992
Synaptic Long Term Depression	1.342	0	0.715579	3.19409
Agrin Interactions at Neuromuscular Junction	N/A	-0.707	1.73121	2.1397
Tight Junction Signaling	N/A	N/A	1.78159	2.07496
GNRH Signaling	1	1.5	0.500135	3.32385
Neuregulin Signaling	N/A	-0.302	1.14838	2.64312
NRF2-mediated Oxidative Stress Response	N/A	-1.508	1.30916	2.45702
D-myo-inositol-5-phosphate Metabolism	N/A	-2.673	0.483389	3.21478
Oxytocin Signaling Pathway	0	2.558	0.656534	3.03532
Salvage Pathways of Pyrimidine Ribonucleotides	2	-0.905	0.938961	2.72642
Neutrophil Extracellular Trap Signaling Pathway	1.134	1.89	0.515774	3.12652
ERK/MAPK Signaling	N/A	-0.229	0.441492	3.20018
3-phosphoinositide Degradation	N/A	-2.138	0.302778	3.32385
PDGF Signaling	N/A	-0.577	0	3.6134
Synaptic Long Term Potentiation	N/A	0	0.473622	3.12652
Insulin Secretion Signaling Pathway	1	1.342	0.302778	3.16203
HIF1α Signaling	0	0.471	0.453908	2.99159
Serotonin Receptor Signaling	1.265	2.043	0.904647	2.50719
CCR3 Signaling in Eosinophils	N/A	-0.707	0.72806	2.64312
D-myo-inositol (1,4,5,6)-Tetrakisphosphate Biosynthesis	N/A	-2.496	0.160379	3.19409
D-myo-inositol (3,4,5,6)-tetrakisphosphate Biosynthesis	N/A	-2.496	0.160379	3.19409
PAK Signaling	2	-0.302	1.14838	2.19859
Sperm Motility	1	2.111	0.512418	2.79542
Circadian Rhythm Signaling	N/A	N/A	0.310806	2.95141
Superpathway of Inositol Phosphate Compounds	N/A	-2.84	0.40218	2.85439
Orexin Signaling Pathway	0	1.414	0.806227	2.44061
Regulation of eIF4 and p70S6K Signaling	N/A	-1.265	0.512418	2.72306
Cardiac Hypertrophy Signaling	1.342	0.243	0.500445	2.72306
Gαq Signaling	1	0	0.576126	2.64312
IL-8 Signaling	N/A	0.5	0.261815	2.95357
GP6 Signaling Pathway	-2.333	1	3.03597	0.139023
VEGF Signaling	N/A	-0.577	0	3.16203
Xenobiotic Metabolism CAR Signaling Pathway	1.134	0	1.26205	1.85479
Protein Ubiquitination Pathway	N/A	N/A	1.14793	1.94152
Oxytocin in Brain Signaling Pathway	N/A	1.698	0.287341	2.79542
Thrombopoietin Signaling	N/A	-0.333	0.195495	2.88695
HER-2 Signaling in Breast Cancer	N/A	-0.832	0.409591	2.64312
Molecular Mechanisms of Cancer	N/A	N/A	0.584277	2.46551
3-phosphoinositide Biosynthesis	N/A	-2.673	0	3.02986
Pyridoxal 5'-phosphate Salvage Pathway	2	-1.134	1.24927	1.77644
nNOS Signaling in Neurons	N/A	N/A	0.609188	2.40715
Role of MAPK Signaling in Promoting the Pathogenesis of Influenza	N/A	0.577	0.29082	2.7152
NGF Signaling	N/A	-0.905	0	2.99882
EIF2 Signaling	N/A	-1.155	0.409105	2.58545
Microautophagy Signaling Pathway	1	0.277	0.893014	2.0771
Xenobiotic Metabolism Signaling	N/A	N/A	1.01336	1.94903
Insulin Receptor Signaling	N/A	0.277	0.449539	2.4919
MicroRNA Biogenesis Signaling Pathway	0.816	-0.535	0.972045	1.96567
Endothelin-1 Signaling	1.342	0.775	0.72806	2.16938
Telomerase Signaling	2	-1.265	0.893014	2.00361
Role of MAPK Signaling in the Pathogenesis of Influenza	N/A	N/A	0.715579	2.16935
Endocannabinoid Developing Neuron Pathway	N/A	0.577	0.483389	2.38069
α-Adrenergic Signaling	N/A	-1	0	2.85439
Melatonin Signaling	N/A	-1.414	0.798246	2.04739
Renin-Angiotensin Signaling	N/A	0.302	0.274971	2.5274
PI3K/AKT Signaling	2	-1.069	0.715579	2.07496
Phagosome Maturation	N/A	N/A	0.383668	2.37855
ERBB4 Signaling	N/A	-0.333	0	2.69398
Role of Tissue Factor in Cancer	-1.342	0.258	0.68898	1.97132
Ceramide Signaling	N/A	1	0.664504	1.99167
Myelination Signaling Pathway	-1.155	0	2.07233	0.551469
Fc Epsilon RI Signaling	N/A	0	0	2.61663
P2Y Purigenic Receptor Signaling Pathway	1	-0.302	0.72806	1.87607
IGF-1 Signaling	2	-0.333	0.90516	1.66047
Nitric Oxide Signaling in the Cardiovascular System	2	0	0.816554	1.74278
PTEN Signaling	N/A	0.577	0.658324	1.89632
Gαi Signaling	N/A	0.632	0.449539	2.09749
Ferroptosis Signaling Pathway	N/A	0.302	0.247367	2.28767
HGF Signaling	N/A	0	0.244856	2.27223
Mitotic Roles of Polo-Like Kinase	N/A	N/A	1.24686	1.26729
ERBB Signaling	N/A	0	0.132927	2.38069
Dopamine-DARPP32 Feedback in cAMP Signaling	0	1.155	0.512418	1.97997
Dilated Cardiomyopathy Signaling Pathway	-0.447	1	0.938961	1.55335
PPARα/RXRα Activation	-1	1.155	0.961407	1.52126
tRNA Charging	N/A	0.816	0.287535	2.16938
UVA-Induced MAPK Signaling	N/A	-1.134	0.619995	1.82079
Coronavirus Replication Pathway	N/A	0.447	1.01336	1.38147
Antiproliferative Role of Somatostatin Receptor 2	N/A	0.333	0	2.38069
FLT3 Signaling in Hematopoietic Progenitor Cells	N/A	-1	0.151541	2.22712
cAMP-mediated signaling	N/A	1.698	0.21127	2.14822
Neurotrophin/TRK Signaling	N/A	-1.414	0	2.35305
Prolactin Signaling	N/A	0	0	2.32583
Glioma Signaling	N/A	0	0.261815	2.0272
ERB2-ERBB3 Signaling	N/A	-0.707	0	2.27223
Semaphorin Signaling in Neurons	N/A	N/A	1.29243	0.955067
Heme Biosynthesis II	N/A	N/A	2.2276	0
Ephrin B Signaling	N/A	0	0.171603	2.04739
Senescence Pathway	0	0.5	0.261815	1.88883
LPS-stimulated MAPK Signaling	N/A	-0.333	0	2.14113
Endometrial Cancer Signaling	N/A	-1.134	0.199792	1.94098
Pyrimidine Ribonucleotides Interconversion	N/A	-0.816	0	2.13113
ILK Signaling	0.816	-0.302	1.24686	0.879596
Gα12/13 Signaling	N/A	0.302	0.242387	1.87607
GDNF Family Ligand-Receptor Interactions	N/A	-1.414	0.160379	1.94152
eNOS Signaling	1	1.342	1.6002	0.447062
CNTF Signaling	N/A	-1.134	0	2.0272
Oncostatin M Signaling	N/A	-0.816	0	2.00361
Pyrimidine Ribonucleotides De Novo Biosynthesis	N/A	-0.816	0	2.00361
BAG2 Signaling Pathway	N/A	0	0.715037	1.28127
ERK5 Signaling	N/A	-0.707	0	1.99353
Endocannabinoid Neuronal Synapse Pathway	N/A	1.897	0.416048	1.56577
Melanoma Signaling	N/A	-1.633	0.238032	1.74278
Erythropoietin Signaling Pathway	N/A	0	0.161129	1.80884
Chronic Myeloid Leukemia Signaling	1.89	-0.775	0.893014	1.07618
Neuropathic Pain Signaling in Dorsal Horn Neurons	N/A	0.707	0.604553	1.35228
Apelin Cardiomyocyte Signaling Pathway	1	0.378	0.938961	1.00872
Caveolar-mediated Endocytosis Signaling	N/A	N/A	0.441492	1.50526
Paxillin Signaling	N/A	-0.333	0.310418	1.61679
GPCR-Mediated Nutrient Sensing in Enteroendocrine Cells	N/A	1.667	0.512418	1.40499
Cell Cycle Regulation by BTG Family Proteins	N/A	N/A	0.29082	1.62426
Type II Diabetes Mellitus Signaling	N/A	0	0.409105	1.50526
Cardiac β-adrenergic Signaling	N/A	0.378	0.160379	1.74245
Apelin Muscle Signaling Pathway	N/A	N/A	0.604553	1.29036
Endocannabinoid Cancer Inhibition Pathway	-0.447	1	0.938961	0.953326
GABA Receptor Signaling	N/A	N/A	0	1.8914
Xenobiotic Metabolism General Signaling Pathway	N/A	-0.905	0.214017	1.67344
Cachexia Signaling Pathway	1.265	0	1.24686	0.626704
VEGF Family Ligand-Receptor Interactions	N/A	-0.707	0.148747	1.72444
Cellular Effects of Sildenafil (Viagra)	N/A	N/A	0.938961	0.919508
NF-κB Activation by Viruses	N/A	-0.378	0.424162	1.43184
Unfolded protein response	N/A	N/A	0.672526	1.17977
SPINK1 General Cancer Pathway	N/A	-0.378	0.178821	1.66047
Thyroid Cancer Signaling	N/A	-1.134	0.419877	1.40573
G-Protein Coupled Receptor Signaling	0.333	1.715	0.310806	1.50526
Xenobiotic Metabolism PXR Signaling Pathway	0.378	-1.667	1.26205	0.535355
Mechanisms of Viral Exit from Host Cells	N/A	N/A	0.281079	1.50944
Growth Hormone Signaling	N/A	0.378	0.17438	1.60466
Purine Nucleotides De Novo Biosynthesis II	N/A	N/A	0	1.77644
Heme Biosynthesis from Uroporphyrinogen-III I	N/A	N/A	1.7643	0
CSDE1 Signaling Pathway	0	N/A	1.36326	0.398178
BEX2 Signaling Pathway	N/A	-0.378	0.409591	1.34792
Glucocorticoid Receptor Signaling	N/A	N/A	0.480987	1.27556
Renal Cell Carcinoma Signaling	N/A	-1.633	0.72806	0.996501
Colorectal Cancer Metastasis Signaling	0	0.535	0.310418	1.40499
Cancer Drug Resistance by Drug Efflux	N/A	-1.633	0.20731	1.49467
Pyrimidine Deoxyribonucleotides De Novo Biosynthesis I	N/A	-1	0	1.69183
Acute Myeloid Leukemia Signaling	N/A	-1.134	0.137358	1.55335
RANK Signaling in Osteoclasts	N/A	1.414	0.137358	1.55335
UVB-Induced MAPK Signaling	N/A	0.816	0	1.67344
HIPPO signaling	N/A	0	0.401997	1.26729
Acetylcholine Receptor Signaling Pathway	0.816	1.265	0.961407	0.70438
Prostate Cancer Signaling	N/A	N/A	0.530868	1.11824
Inhibition of ARE-Mediated mRNA Degradation Pathway	1	-1.134	0.604553	1.03804
Non-Small Cell Lung Cancer Signaling	N/A	-0.707	0.1314	1.49467
Xenobiotic Metabolism AHR Signaling Pathway	-0.447	N/A	1.45494	0.170384
Gαs Signaling	N/A	1	0	1.62251
Inhibition of Angiogenesis by TSP1	N/A	N/A	1.24686	0.356886
Leptin Signaling in Obesity	N/A	N/A	1.13441	0.451536
IL-2 Signaling	N/A	-0.816	0.198833	1.38147
Cardiac Hypertrophy Signaling (Enhanced)	1.342	2.2	0.193934	1.38018
Regulation of Cellular Mechanics by Calpain Protease	N/A	0.378	0.384287	1.17977
Geranylgeranyldiphosphate Biosynthesis	N/A	N/A	0.864565	0.69845
Netrin Signaling	N/A	1.342	0.798246	0.757822
Leukocyte Extravasation Signaling	N/A	0.577	0.296702	1.25247
ABRA Signaling Pathway	N/A	1.89	0.375973	1.14261
Selenocysteine Biosynthesis II (Archaea and Eukaryotes)	N/A	N/A	1.51838	0
Glioblastoma Multiforme Signaling	1	-1.667	0.572995	0.944648
Phospholipases	1	N/A	1.22943	0.27719
Granzyme A Signaling	N/A	-1.134	0	1.50526
JAK/STAT Signaling	N/A	-0.378	0.151541	1.34792
Production of Nitric Oxide and Reactive Oxygen Species in Macrophages	2	-0.302	0.500135	0.984437
Macropinocytosis Signaling	N/A	0.378	0	1.48296
Calcium Signaling	N/A	1.897	0	1.47637
Glutamate Receptor Signaling	N/A	N/A	0.18676	1.28255
STAT3 Pathway	N/A	0	0	1.46735
Androgen Signaling	N/A	1.134	0.17438	1.27143
Apelin Cardiac Fibroblast Signaling Pathway	N/A	N/A	0.90516	0.535355
Antioxidant Action of Vitamin C	-1	-0.447	0.864565	0.553762
Amyloid Processing	N/A	N/A	0.961407	0.451536
IL-22 Signaling	N/A	N/A	0.40218	0.996501
The Visual Cycle	N/A	N/A	0.40218	0.996501
Role of JAK1 and JAK3 in γc Cytokine Signaling	N/A	N/A	0.178821	1.2149
Glycine Cleavage Complex	N/A	N/A	0	1.3731
Pyruvate Fermentation to Lactate	N/A	N/A	0	1.3731
DHCR24 Signaling Pathway	1.342	0	0.972045	0.391587
Breast Cancer Regulation by Stathmin1	-2.121	-1.177	0.345694	1.00872
Estrogen-Dependent Breast Cancer Signaling	N/A	-0.447	0.409591	0.944648
Necroptosis Signaling Pathway	N/A	1.897	0.198833	1.15477
Lymphotoxin β Receptor Signaling	N/A	N/A	0.938961	0.407969
D-myo-inositol (1,4,5)-Trisphosphate Biosynthesis	N/A	N/A	0.864565	0.47596
Tryptophan Degradation X (Mammalian, via Tryptamine)	N/A	N/A	0.86128	0.464547
IL-15 Production	N/A	1	0	1.31948
PEDF Signaling	N/A	-0.816	0.407621	0.911061
Retinol Biosynthesis	N/A	N/A	0	1.29036
Coronavirus Pathogenesis Pathway	1	-1.414	0.938961	0.334393
Acetyl-CoA Biosynthesis I (Pyruvate Dehydrogenase Complex)	N/A	N/A	0	1.26729
Role of Macrophages, Fibroblasts and Endothelial Cells in Rheumatoid Arthritis	N/A	N/A	0.208531	1.03018
Wound Healing Signaling Pathway	1.134	0.333	0.961407	0.258716
Pulmonary Healing Signaling Pathway	N/A	0	0	1.1699
TNFR1 Signaling	N/A	N/A	0.961407	0.199692
Oxidative Phosphorylation	N/A	2.121	0	1.15399
Role of JAK family kinases in IL-6-type Cytokine Signaling	N/A	1	0.72806	0.424502
Leucine Degradation I	N/A	N/A	0	1.07618
FXR/RXR Activation	N/A	N/A	1.05616	0
Melanocyte Development and Pigmentation Signaling	N/A	-1.134	0	1.02608
Sphingosine-1-phosphate Signaling	0	-1	0.816554	0.16852
Immunogenic Cell Death Signaling Pathway	2	N/A	0.972045	0
NER (Nucleotide Excision Repair, Enhanced Pathway)	-1	N/A	0.972045	0
RAR Activation	1.897	1.941	0.972045	0
GDP-glucose Biosynthesis	N/A	N/A	0	0.94385
Glycogen Degradation II	N/A	N/A	0	0.94385
Death Receptor Signaling	1	N/A	0.938961	0
Endoplasmic Reticulum Stress Pathway	N/A	N/A	0.938961	0
Fatty Acid α-oxidation	N/A	N/A	0.938961	0
Histamine Degradation	N/A	N/A	0.938961	0
Oxidative Ethanol Degradation III	N/A	N/A	0.935341	0
L-glutamine Biosynthesis II (tRNA-dependent)	N/A	N/A	0.933281	0
Xanthine and Xanthosine Salvage	N/A	N/A	0.933281	0
Putrescine Degradation III	N/A	N/A	0.924604	0
Aryl Hydrocarbon Receptor Signaling	N/A	N/A	0.894919	0
Ethanol Degradation IV	N/A	N/A	0.879975	0
Glycolysis I	N/A	N/A	0.879975	0
Adenine and Adenosine Salvage I	N/A	N/A	0.864565	0
Guanine and Guanosine Salvage I	N/A	N/A	0.864565	0
Palmitate Biosynthesis I (Animals)	N/A	N/A	0.864565	0
PXR/RXR Activation	N/A	N/A	0.864565	0
GPCR-Mediated Integration of Enteroendocrine Signaling Exemplified by an L Cell	N/A	N/A	0.758247	0
Dopamine Degradation	N/A	N/A	0.756711	0
Ethanol Degradation II	N/A	N/A	0.72806	0
Role of BRCA1 in DNA Damage Response	N/A	N/A	0.72806	0

## Sheet: Upstream regulators
© 2000-2024 QIAGEN. All rights reserved.	z-score	z-score	BH pvalue	BH pvalue
Upstream Regulators	CX_Global (AGE vs controls) - 2023-07-01 03:17 PM	Hippo_Global (AGE vs controls) - 2023-07-01 03:19 PM	CX_Global (AGE vs controls) - 2023-07-01 03:17 PM	Hippo_Global (AGE vs controls) - 2023-07-01 03:19 PM
MAPT	N/A	N/A	2.14251	13.9164
APP	0.945	-0.445	2.71385	10.1285
PSEN1	N/A	0.658	1.88805	9.70079
TP53	-0.442	-1.781	2.71385	7.71742
memantine	N/A	1.763	0	9.94137
levodopa	2.033	1.185	2.91582	5.41416
FMR1	-0.915	0.28	0.775026	7.02464
MKNK1	0.277	-1.265	5.35181	1.56567
HNF4A	1.229	1.165	3.95776	2.92128
HDAC4	N/A	N/A	0	6.33236
BDNF	2.03	-0.787	5.4234	0.898504
SOD1	N/A	N/A	1.27187	4.10907
HTT	-0.034	-1.276	2.31181	2.97201
KCNJ2	-1	-2.668	0.731809	4.08726
D-glucose	-0.602	-1.017	2.31181	2.31834
COLQ	1.195	N/A	4.61208	0
uranyl nitrate	0.447	1.291	1.07753	3.42172
mir-802	-1.912	-0.895	1.556	2.67674
metribolone	-0.128	-0.275	1.6149	2.61471
GnRH analog	N/A	-0.123	0	4.19244
ESR1	0.249	-1.698	0.975849	3.13384
SORL1	-1.732	N/A	3.95776	0
RICTOR	N/A	-2.058	0	3.94635
SNCA	0.398	1.064	0.834367	3.03438
CPT1B	2	-1.155	0.669561	3.15375
Insulin	1.183	-1.011	3.03189	0.612737
CST5	0.333	-1.091	1.28835	2.28524
let-7a-5p (and other miRNAs w/seed GAGGUAG)	1.188	0.656	2.81292	0.741522
GABA	N/A	-1.219	0	3.41262
PTEN	-0.581	-0.553	0.78779	2.61471
sirolimus	-0.73	-0.551	1.82183	1.56567
TGFB1	-1.319	-0.788	2.14251	1.20037
5-fluorouracil	-0.923	0.055	0.917615	2.33835
beta-estradiol	-1.013	0.584	1.90655	1.33912
SUCNR1	-2.236	N/A	3.23009	0
hydroxypropyl-beta-cyclodextrin	2.646	-0.333	2.03839	1.12331
COL4A3	N/A	N/A	3.12474	0
ATP5IF1	N/A	N/A	0	3.11478
CSF3	-2	-0.081	0.492147	2.55049
tanespimycin	-0.128	-1.596	1.27364	1.74845
CD3	2.137	0.128	1.07848	1.8166
ZC3H11A	0	-2	2.43275	0.394675
STK11	N/A	-0.6	0	2.7959
MTOR	0.2	-0.961	0.751314	2.03193
SP2509	0	-0.728	2.14251	0.612737
WT1	-0.251	-0.601	2.14251	0.612737
NFE2L2	2.901	-0.093	1.17082	1.56627
trichostatin A	0.466	-1.485	2.11154	0.612737
benzo(a)pyrene	0.447	-0.971	1.28835	1.43356
geldanamycin	0.618	-0.351	1.92666	0.786149
SPDEF	1.941	N/A	2.68743	0
Calmodulin	N/A	1.265	0	2.67674
phytohemagglutinin	1.373	-0.366	1.44834	1.22545
YAP1	-2.359	-0.179	1.37298	1.2934
MYC	0.519	0.749	0.975849	1.64752
PTP4A1	N/A	1.237	0	2.61471
REST	N/A	-0.028	0	2.61471
tazemetostat	0	-0.5	2.07254	0.539859
Ubiquitin	-2	N/A	2.59664	0
mir-122	-0.319	2.021	1.20206	1.39191
E2F1	0.924	1.028	1.47951	1.1067
KRAS	0.863	1.081	1.19726	1.36271
HOXA10	-0.632	N/A	2.5539	0
ERG	-1.4	-2.333	1.66635	0.866039
miR-1-3p (and other miRNAs w/seed GGAAUGU)	-0.61	1.253	1.18326	1.32459
prednisolone	-1.64	0	1.88245	0.612737
CLPP	0	-0.333	0.998441	1.49514
CTNNB1	-0.813	-1.182	1.56241	0.866039
DSCAML1	-1.342	-1	1.27936	1.13674
APOE	-1.974	-0.475	1.64546	0.765837
UQCC3	N/A	N/A	0	2.33835
3,5-dihydroxyphenylglycine	N/A	-0.258	0	2.31834
RYR1	N/A	N/A	0	2.31834
HSF1	1.491	-0.331	1.08075	1.23133
CD44	-0.941	N/A	2.31181	0
dihydrotestosterone	-0.576	N/A	2.31181	0
miR-338-3p (miRNAs w/seed CCAGCAU)	2.236	N/A	2.31181	0
MYL2	N/A	N/A	1.67627	0.612737
1,2-dithiol-3-thione	2.149	-0.986	1.41698	0.866039
RASSF1	-2.607	N/A	2.27221	0
PAX3	N/A	N/A	0.696271	1.54274
medroxyprogesterone acetate	-1.069	1.778	1.71773	0.512177
IBTK	N/A	N/A	0.836158	1.31554
miR-29b-3p (and other miRNAs w/seed AGCACCA)	1.327	N/A	2.14251	0
decitabine	-1.014	N/A	2.08604	0
UBA1	-1	N/A	2.08604	0
FKRP	N/A	N/A	2.05715	0
torin1	N/A	-0.508	0	2.02498
VANGL2	N/A	N/A	1.37298	0.644242
MASTL	N/A	-0.104	0	2.01083
PPARGC1A	1.511	0.057	0.971023	1.03636
mibolerone	N/A	-2.206	0	1.99055
MMP3	-1.342	0.333	1.10717	0.866039
OGA	2.309	0.894	1.41747	0.546362
CLUH	1.067	-1.802	1.20206	0.755737
2-amino-1-methyl-6-phenylimidazo-4-5-b-pyridine	2	-1	1.44834	0.495611
LRP5	-0.223	N/A	1.92341	0
mifepristone	-0.18	N/A	1.91642	0
cobalt chloride	N/A	N/A	1.91385	0
miR-335-3p (miRNAs w/seed UUUUCAU)	2	N/A	1.88805	0
PRNP	2.19	N/A	1.88805	0
lactacystin	0.912	-1.961	1.47227	0.415762
trehalose	N/A	N/A	1.88245	0
FUS	N/A	N/A	1.18326	0.687888
ramipril	2	N/A	1.86855	0
CD300LF	N/A	-1.633	0	1.86768
ADORA2A	-0.156	0.451	0.914832	0.933897
6-hydroxydopamine	0.689	-1.467	0.836158	0.998133
miR-30c-5p (and other miRNAs w/seed GUAAACA)	0.734	1.765	1.37298	0.457906
GRN	N/A	1.411	0.730099	1.09832
H1-6	0	-0.707	0.960998	0.866039
H1f1	0	-0.707	0.960998	0.866039
camptothecin	0.632	N/A	1.82642	0
IREB2	N/A	N/A	1.28835	0.535333
8-bromo-cAMP	-0.839	N/A	1.82183	0
apomorphine	N/A	-0.816	0	1.8166
NPC1	N/A	0.207	0	1.8166
PHLPP2	N/A	-0.246	0	1.8166
EEF2K	N/A	N/A	1.20206	0.612737
MECP2	-1.964	-0.089	1.09748	0.691779
epoxomicin	N/A	-1.698	1.15987	0.624254
HSPA8	N/A	N/A	1.17082	0.612737
dexamethasone	-0.549	0.561	1.18326	0.596417
CASC8	N/A	N/A	1.77668	0
GIMAP1-GIMAP5	N/A	N/A	1.77668	0
lisofylline	N/A	N/A	1.77668	0
CD 437	N/A	0.525	0	1.77606
RBM20	N/A	N/A	0	1.77606
ESR2	1.162	-1.276	0.901851	0.866039
SP110	0.447	1.508	0.886773	0.880919
lactic acid	-0.132	-1.192	1.18612	0.579549
Lh	N/A	-1	0	1.75866
KDM5A	N/A	-1.387	0	1.74845
HNF1B	-0.447	N/A	1.74553	0
GCG	0.865	-0.864	0.702334	1.03688
3-methyladenine	2.093	N/A	1.71773	0
dexmedetomidine	-1.342	N/A	1.71773	0
PGR	1.748	N/A	1.71773	0
abemaciclib	0	N/A	1.70884	0
IL15	-1.546	-1.69	0.696271	1.0089
GLI1	-0.093	0.508	0.975849	0.718701
PC-SPES	N/A	N/A	1.69137	0
TFAM	N/A	0.102	0	1.68327
3-nitropropionic acid	N/A	N/A	0.836158	0.843983
4-O-carboxymethylascochlorin	N/A	-1	0.80778	0.866039
ANGPTL3	N/A	N/A	1.10439	0.567977
trans-hydroxytamoxifen	0.707	N/A	1.66635	0
PLX5622	N/A	0.425	0	1.66485
CX3CR1	1.134	2.333	1.27364	0.388371
GAST	N/A	-0.221	0	1.65876
JAK1/2	N/A	1	0	1.64907
arsenite	N/A	N/A	1.03611	0.612737
TSC1	N/A	1.748	0	1.64752
molybdenum disulfide	2.646	N/A	1.64369	0
SMAD3	-2.003	N/A	1.6072	0
IFNG	0.264	N/A	1.60559	0
NDUFA4L2	N/A	N/A	1.60559	0
OBSCN	N/A	N/A	1.60559	0
tretinoin	0.023	-0.327	0.990848	0.612737
PAX3-FOXO1	-0.239	-2.668	0.78779	0.814644
CCND1	0.816	-0.359	0.836158	0.765837
MYCN	0.788	-1.092	0.836158	0.765837
4-(4-(3-(4-trifluoromethoxy-phenyl)ureido)cyclohexyloxy)benzoic acid	N/A	N/A	0.731809	0.866039
bafilomycin	N/A	N/A	0.731809	0.866039
MYOT	N/A	N/A	0.731809	0.866039
SKL-2001	N/A	N/A	0.731809	0.866039
carnitine	N/A	N/A	0.975849	0.612737
dihydroxyphenylethylene glycol	N/A	N/A	0.975849	0.612737
KANSL1	N/A	N/A	0.975849	0.612737
KIF21A	N/A	N/A	0.975849	0.612737
Lamin b	N/A	N/A	0.975849	0.612737
Leu5-enkephalin regulatory factor	N/A	N/A	0.975849	0.612737
PDLIM5	N/A	N/A	0.975849	0.612737
phosphorodiamidate morpholino oligomers	N/A	N/A	0.975849	0.612737
Sos	N/A	N/A	0.847283	0.731161
vancomycin	N/A	-0.955	0	1.57249
DMD	N/A	N/A	1.01735	0.547852
ammonium	N/A	0	0	1.55953
APOC1	N/A	N/A	1.556	0
CSDE1	N/A	N/A	1.556	0
RHO	1	N/A	1.556	0
quinolinic acid	N/A	-0.292	0.924224	0.612737
MAP1LC3B	N/A	N/A	1.03611	0.495611
DAG1	N/A	N/A	1.49051	0
8-chlorophenylthio-adenosine 3',5'-cyclic monophosphate	N/A	-1.34	0.873586	0.612737
ABCB6	1.067	N/A	1.48424	0
PTPRR	0	1.414	0.836158	0.644242
HMGA1	-0.478	2.182	1.19726	0.262338
GFAP	N/A	N/A	1.45738	0
miR-1285-3p (and other miRNAs w/seed CUGGGCA)	N/A	N/A	1.45738	0
MIR378I	N/A	N/A	1.45738	0
PLN	N/A	N/A	0.836158	0.612737
puromycin	N/A	N/A	0.836158	0.612737
DRD1/5	N/A	N/A	0.696271	0.744582
WNT2B	N/A	N/A	0.696271	0.744582
gentamicin	N/A	-1.706	0	1.43356
TH	N/A	N/A	0	1.43356
miR-16-5p (and other miRNAs w/seed AGCAGCA)	-1.664	-1.246	0.830813	0.593287
MALAT1	N/A	N/A	1.42024	0
NR6A1	N/A	N/A	1.42024	0
plicamycin	-0.946	N/A	1.42024	0
RAD21L1	N/A	N/A	0.742623	0.676411
STAG3	N/A	N/A	0.742623	0.676411
clasto-lactacystin beta-lactone	N/A	-0.293	0	1.39191
MMP11	N/A	-1.477	0	1.39191
cadmium chloride	-0.152	-1.982	1.19726	0.193918
TARDBP	N/A	0	0.736597	0.640634
LAMP2	N/A	1	0.731809	0.644242
SMC1B	N/A	N/A	0.731809	0.644242
miR-378a-3p (and other miRNAs w/seed CUGGACU)	N/A	N/A	1.37496	0
ADAM32	N/A	N/A	1.37298	0
ATG5	N/A	0.707	1.37298	0
CD38	0.873	N/A	1.37298	0
LRIG2	N/A	N/A	1.37298	0
Pzp	N/A	N/A	1.37298	0
TFPI	N/A	N/A	1.37298	0
VCAN	-0.378	N/A	1.37298	0
GNA12	N/A	0.342	0.696271	0.676411
aflatoxin B1	1.414	-3.162	1.19726	0.166289
Z-LLL-CHO	1.903	N/A	1.36063	0
ATG7	N/A	-0.714	0	1.35017
GDNF	N/A	-0.688	0.731809	0.612737
kainic acid	2.219	-0.396	0.731809	0.612737
miR-9-5p (and other miRNAs w/seed CUUUGGU)	N/A	0.128	0.731809	0.612737
Firre	N/A	1	0	1.32459
GSKJ4	N/A	-0.333	0	1.32459
sodium tungstate	N/A	-0.152	0.70934	0.612737
MAFF	N/A	0.218	0	1.3219
MID1	N/A	N/A	0	1.31554
fluoride	N/A	0.333	0	1.3149
CLIC4	-0.152	N/A	1.28835	0
F2	1.847	N/A	1.28835	0
FXR ligand-FXR-Retinoic acid-RXRα	N/A	N/A	1.28835	0
HRAS	-0.64	N/A	1.28835	0
muscarine	N/A	N/A	1.27936	0
ULK1	N/A	N/A	1.27936	0
WDFY2	N/A	N/A	1.27936	0
mir-7	N/A	N/A	1.27364	0
SGPP2	N/A	N/A	1.27364	0
Pln	N/A	N/A	0.775026	0.495611
sulforafan	0.447	-0.38	0.687707	0.567618
HOXA9	N/A	N/A	1.23595	0
MXD1	N/A	0	0.696271	0.536608
NGEF	N/A	-1	0	1.23133
rifaximin	N/A	0.447	0	1.23133
SMYD1	N/A	N/A	0	1.23133
dihematoporphyrin ether	N/A	N/A	1.20206	0
IND S7	N/A	N/A	1.20206	0
PLCD1	N/A	N/A	1.20206	0
dichlorovinylcysteine	N/A	N/A	1.19726	0
epicatechin	-2.236	N/A	1.19726	0
FOXA1	0.707	N/A	1.19726	0
MAP3K12	N/A	N/A	1.19726	0
MEL S3	N/A	N/A	1.19726	0
NR1H4	0.186	N/A	1.19726	0
TAFAZZIN	1.066	N/A	1.19726	0
TO-901317	0.587	N/A	1.19726	0
DENR	N/A	N/A	0	1.1952
ingenol mebutate	N/A	N/A	0	1.1952
SL 327	N/A	-1.342	0	1.1952
XAV939	N/A	N/A	0	1.1952
ROCK1	N/A	N/A	1.17945	0
TEAD1	N/A	0.277	0	1.17792
RB1	-1	2.719	0.742623	0.434737
ACOX1	0.128	N/A	1.17703	0
AGRN	N/A	N/A	1.17082	0
SNHG7	N/A	N/A	1.17082	0
mir-29	0.492	N/A	1.16383	0
SIAH2	N/A	N/A	1.13747	0
TRIB1	N/A	0.478	0	1.13674
RELA	0.419	N/A	1.13351	0
arsenic trioxide	N/A	0.632	0	1.13193
ibrutinib	N/A	-1.732	0	1.13182
KLF3	N/A	0.853	0	1.12517
colistin	N/A	0.333	0	1.12331
NFASC	N/A	-2	0	1.12038
CREB1	N/A	0.845	0	1.11749
lenalidomide	1.588	N/A	1.11706	0
CNR1	0	N/A	1.10439	0
PARP	N/A	N/A	1.10439	0
SYT11	N/A	N/A	1.10439	0
ARID1A	0.928	N/A	1.09748	0
miR-34a-5p (and other miRNAs w/seed GGCAGUG)	0.978	N/A	1.09748	0
TCF20	-1	N/A	1.09748	0
AKR1C1/AKR1C2	N/A	N/A	0	1.09674
cuprizone	N/A	0.577	0	1.09674
GCN2iB	N/A	-1.706	0	1.09544
kanamycin A	N/A	0.333	0	1.09544
QKI	0.038	-1.993	0.883485	0.208283
bardoxolone	N/A	N/A	1.08229	0
ARNT2	0.378	N/A	1.08163	0
RET	1.387	N/A	1.07753	0
PRKCG	N/A	N/A	0	1.07304
DLX1	-0.152	N/A	1.07077	0
Nr1h	1.554	N/A	1.06951	0
miR-7a-5p (and other miRNAs w/seed GGAAGAC)	N/A	N/A	1.06795	0
5-azacytidine	N/A	0.008	0	1.06444
bisphenol A	N/A	-1.69	0	1.06444
IP7e	N/A	N/A	1.06236	0
kukoamine A	N/A	N/A	1.06236	0
IL4	0.807	-2.449	0.742623	0.307763
G protein alpha	N/A	-1	0	1.04811
CRYAB	N/A	N/A	1.04363	0
daunorubicin	N/A	N/A	1.04363	0
EGFR	0.287	N/A	1.03749	0
TWIST1	-0.36	N/A	1.03749	0
MLXIPL	N/A	-0.458	0	1.03636
4-phenylbutyric acid	0.277	N/A	1.03611	0
ANTXR2	N/A	N/A	1.03611	0
astragaloside IV	N/A	N/A	1.03611	0
azetidyl-2-carboxylic acid	N/A	N/A	1.03611	0
CCAT1	N/A	N/A	1.03611	0
CDK4/6	0	N/A	1.03611	0
ciprofloxacin	0.447	N/A	1.03611	0
cisplatin	-0.457	N/A	1.03611	0
CLCA2	N/A	N/A	1.03611	0
FN1	0.218	N/A	1.03611	0
FOS	1.134	N/A	1.03611	0
ITGB1	N/A	N/A	1.03611	0
SIM1	0.378	N/A	1.03611	0
SOX2-OT	N/A	N/A	1.03611	0
UT-143	N/A	N/A	1.03611	0
STIP1	N/A	N/A	0	1.01956
TBC1D10A	N/A	N/A	0	1.01956
CHD8	1	N/A	1.01107	0
SIRT3	0.871	N/A	1.01107	0
benzyl isothiocyanate	N/A	-1.746	0	1.0089
SHANK3	N/A	N/A	0	1.0089
WZ-4002	N/A	N/A	0	1.0089
ACO1	N/A	N/A	0.998441	0
APOC3	N/A	N/A	0.998441	0
EHD1	N/A	N/A	0.998441	0
FZD4	N/A	N/A	0.998441	0
HULC	N/A	N/A	0.998441	0
LAMA2	N/A	N/A	0.998441	0
LXR ligand-LXR-Retinoic acid-RXRα	N/A	N/A	0.998441	0
mir-1	-1.131	N/A	0.998441	0
RBP1	N/A	N/A	0.998441	0
silibinin	0.191	N/A	0.998441	0
mir-210	N/A	-0.061	0	0.998133
pimagedine	N/A	N/A	0.994249	0
raloxifene	0.816	N/A	0.990848	0
TGFB2	-1.285	N/A	0.990848	0
SRSF1	N/A	N/A	0.986213	0
3-iodothyronamine	N/A	N/A	0.975849	0
AHCTF1	N/A	N/A	0.975849	0
aloxistatin	N/A	N/A	0.975849	0
anti-miR-126-3p inhibitor	N/A	N/A	0.975849	0
AP4B1	N/A	N/A	0.975849	0
BC-DXI01	N/A	N/A	0.975849	0
beta-elemene	N/A	N/A	0.975849	0
bis-T-23	N/A	N/A	0.975849	0
bleomycin	1.562	N/A	0.975849	0
BL-V8-310	N/A	N/A	0.975849	0
CA1	N/A	N/A	0.975849	0
CASC19	N/A	N/A	0.975849	0
COL9A1	N/A	N/A	0.975849	0
dazucorilant	N/A	N/A	0.975849	0
DNAJA4	N/A	N/A	0.975849	0
EEF1G	N/A	N/A	0.975849	0
epi-BL-V8-310	N/A	N/A	0.975849	0
EXTL2	N/A	N/A	0.975849	0
fluorescein	N/A	N/A	0.975849	0
FMNL1	N/A	N/A	0.975849	0
FOXH1	N/A	N/A	0.975849	0
gataparsen	N/A	N/A	0.975849	0
hydrocortisone phosphate	N/A	N/A	0.975849	0
IL5	1.414	N/A	0.975849	0
KAT6B	N/A	N/A	0.975849	0
KRT19P3	N/A	N/A	0.975849	0
LAMA4	1.633	N/A	0.975849	0
Laminin (complex)	N/A	N/A	0.975849	0
LCOR	N/A	N/A	0.975849	0
MATN3	N/A	N/A	0.975849	0
MIA-602	N/A	N/A	0.975849	0
miR-10a-5p (and other miRNAs w/seed ACCCUGU)	N/A	N/A	0.975849	0
mir-493	N/A	N/A	0.975849	0
Mir6368	N/A	N/A	0.975849	0
miR-661 (miRNAs w/seed GCCUGGG)	N/A	N/A	0.975849	0
MTI-101	N/A	N/A	0.975849	0
NCT-80	N/A	N/A	0.975849	0
PCK1	N/A	N/A	0.975849	0
PDGF (family)	N/A	N/A	0.975849	0
RAB22A	N/A	N/A	0.975849	0
RETNLB	-0.218	N/A	0.975849	0
RO5256390	N/A	N/A	0.975849	0
RPL9	N/A	N/A	0.975849	0
SC144	N/A	N/A	0.975849	0
SETD2	N/A	N/A	0.975849	0
SOX17	N/A	N/A	0.975849	0
SP600125	1.066	N/A	0.975849	0
STAT6	-1	N/A	0.975849	0
TESC	N/A	N/A	0.975849	0
tiazofurin	N/A	N/A	0.975849	0
VPS4B	N/A	N/A	0.975849	0
ZFAS1	N/A	N/A	0.975849	0
amphetamine	N/A	N/A	0.960998	0
LMO2	N/A	0.943	0	0.959313
BRCA1	0	-1.927	0.959126	0
AMP	N/A	N/A	0.95632	0
mir-378	N/A	N/A	0.95632	0
HNF4G	N/A	N/A	0.93842	0
vincristine	N/A	N/A	0.93842	0
MYOC	N/A	N/A	0.936298	0
AKT1	-1.353	N/A	0.932327	0
RXRA	-0.113	N/A	0.932327	0
WBP2	-0.277	N/A	0.926429	0
FGF19	N/A	N/A	0.925749	0
MYB	0.193	1.951	0.731809	0.193918
CUL4B	N/A	N/A	0.924224	0
DNAJB6	N/A	N/A	0.923117	0
NRG4	N/A	N/A	0.923117	0
WWP2	N/A	N/A	0.923117	0
TP73	0.905	N/A	0.917615	0
2-chloro-N(6)cyclopentyladenosine	N/A	N/A	0	0.90106
mir-205	N/A	N/A	0.886773	0
mir-322	N/A	N/A	0.886773	0
SLIT2	N/A	N/A	0.886773	0
Sox2ot	N/A	N/A	0.886773	0
ST1926	N/A	0.577	0	0.883992
metronidazole	N/A	0.333	0	0.880919
manganese	0	N/A	0.870763	0
6-dimethylaminopurine	N/A	N/A	0	0.866039
chromium	N/A	0.816	0	0.866039
cyclopropanecarboxylic acid	N/A	N/A	0	0.866039
dexpramipexole	N/A	N/A	0	0.866039
FMN2	N/A	N/A	0	0.866039
IGF1R	N/A	0.745	0	0.866039
imatinib	N/A	0.245	0	0.866039
KLF15	N/A	-1.033	0	0.866039
LINC00173	N/A	N/A	0	0.866039
LSINCT5	N/A	N/A	0	0.866039
PNPLA2	N/A	-1.348	0	0.866039
PPP2R2C	N/A	N/A	0	0.866039
RAC2	N/A	N/A	0	0.866039
RNASEH1	N/A	N/A	0	0.866039
sertindole	N/A	N/A	0	0.866039
SPG7	N/A	N/A	0	0.866039
tin mesoporphyrin	N/A	N/A	0	0.866039
ZC3H13	N/A	N/A	0	0.866039
acyline	N/A	N/A	0	0.86495
LDB1	N/A	1.199	0	0.858776
LEPR	0.068	1.98	0.856816	0
mir-503	N/A	N/A	0.856816	0
PREX1	N/A	N/A	0.856816	0
SNHG11	N/A	N/A	0.856816	0
taxifolin	N/A	N/A	0.856816	0
TFEC	N/A	N/A	0.856816	0
UBQLN2	N/A	N/A	0.856816	0
monobutyl phthalate	N/A	-2.236	0	0.852357
BCOR	N/A	N/A	0.845653	0
bicalutamide	N/A	N/A	0.845653	0
IRS1	N/A	N/A	0.845653	0
mir-133	N/A	1.134	0	0.843983
ciprofibrate	0.277	N/A	0.837233	0
1,1-bis(3'-indolyl)-1-(4-chlorophenyl)methane	N/A	N/A	0.836158	0
22-hydroxycholesterol	N/A	N/A	0.836158	0
4-aminopyrazolo(3,4-d)pyrimidine	N/A	N/A	0.836158	0
AFM	N/A	N/A	0.836158	0
AKT inhibitor VII	N/A	N/A	0.836158	0
all-trans-4-Oxo-retinoic acid	N/A	N/A	0.836158	0
ALYREF	N/A	N/A	0.836158	0
BHLH	N/A	N/A	0.836158	0
BIRC5	N/A	N/A	0.836158	0
BMS-345541	N/A	N/A	0.836158	0
bortezomib	1.195	N/A	0.836158	0
CCN4	N/A	N/A	0.836158	0
ceapin-A7	N/A	N/A	0.836158	0
crenigacestat	N/A	N/A	0.836158	0
CST7	N/A	N/A	0.836158	0
cyclo(iso-Asp-GR)-LLIIKLAKLAKKLAKLAK	N/A	N/A	0.836158	0
dibucaine	N/A	N/A	0.836158	0
ENKUR	N/A	N/A	0.836158	0
EPN3	N/A	N/A	0.836158	0
ethanol	0.74	N/A	0.836158	0
F2R	-1.154	N/A	0.836158	0
FAIM2	N/A	N/A	0.836158	0
FBXL4	N/A	N/A	0.836158	0
FGL1	N/A	N/A	0.836158	0
GAN	N/A	N/A	0.836158	0
GFPT2	N/A	N/A	0.836158	0
ginkgetin	N/A	N/A	0.836158	0
HSPA5	N/A	N/A	0.836158	0
HSPE1	N/A	N/A	0.836158	0
lynestrenol	N/A	N/A	0.836158	0
MATN1	N/A	N/A	0.836158	0
ME1	N/A	N/A	0.836158	0
miR-548h-5p (and other miRNAs w/seed AAAGUAA)	N/A	N/A	0.836158	0
MIR5590	N/A	N/A	0.836158	0
MIR585	N/A	N/A	0.836158	0
miR-6510-5p (miRNAs w/seed AGCAGGG)	N/A	N/A	0.836158	0
mir-663	N/A	N/A	0.836158	0
mir-944	N/A	N/A	0.836158	0
MS049	N/A	N/A	0.836158	0
MSI2	N/A	N/A	0.836158	0
MTM1	N/A	N/A	0.836158	0
MUC1	N/A	N/A	0.836158	0
MYLK	N/A	N/A	0.836158	0
NGF	0.645	N/A	0.836158	0
NID1	N/A	N/A	0.836158	0
NR3C2	0	N/A	0.836158	0
PBX3	N/A	N/A	0.836158	0
PDIA6	N/A	N/A	0.836158	0
PLEKHM1	N/A	N/A	0.836158	0
PNKD	N/A	N/A	0.836158	0
POU5F1	-1.109	N/A	0.836158	0
PPM1E	N/A	N/A	0.836158	0
PTP4A3	N/A	N/A	0.836158	0
Rab11	N/A	N/A	0.836158	0
RAMP3	N/A	N/A	0.836158	0
RPS4Y1	N/A	N/A	0.836158	0
SCN1A	N/A	N/A	0.836158	0
SHMT2	N/A	N/A	0.836158	0
SIAH1	N/A	N/A	0.836158	0
sodium iodate	N/A	N/A	0.836158	0
TCHP	N/A	N/A	0.836158	0
TIAM2	N/A	N/A	0.836158	0
TP53BP1	N/A	N/A	0.836158	0
TP63	1.431	N/A	0.836158	0
ULK2	N/A	N/A	0.836158	0
USP46	N/A	N/A	0.836158	0
Yi-Gan San	N/A	N/A	0.836158	0
ZFAT	N/A	N/A	0.836158	0
ZNF202	N/A	N/A	0.836158	0
LRP6	N/A	N/A	0.824069	0
MEN1	N/A	N/A	0.824069	0
ZAP70	N/A	N/A	0.824069	0
Atg5	N/A	N/A	0	0.823281
B4GALNT1	N/A	N/A	0	0.818234
CCAR2	N/A	1.342	0	0.818234
LRRK2	N/A	N/A	0	0.818234
nicotinamide-beta-riboside	N/A	-1.633	0	0.818234
NSD2	N/A	N/A	0	0.818234
miR-218-5p (and other miRNAs w/seed UGUGCUU)	N/A	N/A	0.80778	0
Tgf beta	-1.175	N/A	0.8033	0
KDM8	N/A	-0.128	0	0.801296
poly rI:rC-RNA	0.664	N/A	0.797205	0
2,4,5,2',4',5'-hexachlorobiphenyl	N/A	-0.333	0	0.796632
NR3C1	N/A	N/A	0.793526	0
ONECUT1	N/A	N/A	0.790346	0
BCR (complex)	N/A	1.824	0	0.790283
Creb	N/A	-0.981	0	0.790283
tetraethylammonium	N/A	0.555	0	0.790283
CCAT2	N/A	N/A	0.78779	0
ENO1	N/A	N/A	0.78779	0
IL2	0.605	N/A	0.78779	0
KU-55933	N/A	N/A	0.78779	0
mocetinostat	N/A	N/A	0.78779	0
NTRK1	N/A	N/A	0.78779	0
SAV1	N/A	N/A	0.78779	0
TNFAIP6	N/A	N/A	0.78779	0
AKT2	N/A	N/A	0.786919	0
PTGES	N/A	N/A	0.786919	0
ZEB1	-1.117	N/A	0.783902	0
(E)-1-(2-nitrovinyl)naphthalene	N/A	N/A	0.775026	0
(E)-9-(2-nitrovinyl)anthracene	N/A	N/A	0.775026	0
2-(3-chlorophenylamino)phenylacetic acid	N/A	N/A	0.775026	0
AA-861	N/A	N/A	0.775026	0
ACOT12	N/A	N/A	0.775026	0
AIM-100	N/A	N/A	0.775026	0
ALK	N/A	N/A	0.775026	0
amifostine	N/A	N/A	0.775026	0
apomine	N/A	N/A	0.775026	0
aumolertinib	N/A	N/A	0.775026	0
BCL2L10	N/A	N/A	0.775026	0
BIRC7	N/A	N/A	0.775026	0
BMI1	N/A	N/A	0.775026	0
BMP7	0.447	N/A	0.775026	0
carfilzomib	N/A	N/A	0.775026	0
CBS/LOC102724560	N/A	N/A	0.775026	0
CCR2	-1	N/A	0.775026	0
CD9	N/A	N/A	0.775026	0
CDP ethanolamine	N/A	N/A	0.775026	0
chelerythrine	N/A	N/A	0.775026	0
chlorisondamine	N/A	N/A	0.775026	0
CKLF	N/A	N/A	0.775026	0
CMAHP	N/A	N/A	0.775026	0
CNTN1	N/A	N/A	0.775026	0
compound SI-1	N/A	N/A	0.775026	0
compound SI-2	N/A	N/A	0.775026	0
CoREST	N/A	N/A	0.775026	0
CRYAA/LOC102724652	N/A	N/A	0.775026	0
CTSS	N/A	N/A	0.775026	0
DDX24	N/A	N/A	0.775026	0
DDX28	N/A	N/A	0.775026	0
DIO3	0.447	N/A	0.775026	0
EMP2	N/A	N/A	0.775026	0
Ewsr1	N/A	N/A	0.775026	0
FOXO3	2.371	N/A	0.775026	0
Gamma tubulin (family)	N/A	N/A	0.775026	0
GBP3	N/A	N/A	0.775026	0
GNA15	N/A	N/A	0.775026	0
GSTO1	N/A	N/A	0.775026	0
HIF1A-AS1	N/A	N/A	0.775026	0
HPGD	N/A	N/A	0.775026	0
hyodeoxycholic acid	N/A	N/A	0.775026	0
Irs4	N/A	N/A	0.775026	0
LDL	0.956	N/A	0.775026	0
LHX8	N/A	N/A	0.775026	0
LTK	N/A	N/A	0.775026	0
L-triiodothyronine	-1.133	N/A	0.775026	0
MAGEA11	N/A	N/A	0.775026	0
Manf	N/A	N/A	0.775026	0
MEIS2	N/A	N/A	0.775026	0
melatonin	-1.067	N/A	0.775026	0
methoxyacetic acid	N/A	N/A	0.775026	0
mir-10	-1.037	N/A	0.775026	0
Mir100hg	N/A	N/A	0.775026	0
miR-340-3p (and other miRNAs w/seed CCGUCUC)	N/A	N/A	0.775026	0
MMP1	N/A	N/A	0.775026	0
MSRA	N/A	N/A	0.775026	0
MYLIP	N/A	N/A	0.775026	0
NANOG	N/A	N/A	0.775026	0
NCOR-LXR-Oxysterol-RXR-9 cis RA	N/A	N/A	0.775026	0
nilutamide	N/A	N/A	0.775026	0
nilvadipine	N/A	N/A	0.775026	0
nitrofurantoin	-0.447	N/A	0.775026	0
nitromifene	N/A	N/A	0.775026	0
NRG2	N/A	N/A	0.775026	0
oleuropein aglycone	N/A	N/A	0.775026	0
Pick1	N/A	N/A	0.775026	0
PLC gamma	N/A	N/A	0.775026	0
POU4F1	N/A	N/A	0.775026	0
Prl3b1	N/A	N/A	0.775026	0
PTPN23	N/A	N/A	0.775026	0
PUM2	N/A	N/A	0.775026	0
RAB11FIP1	N/A	N/A	0.775026	0
RADIL	N/A	N/A	0.775026	0
safrole	N/A	N/A	0.775026	0
SALL4	1.342	N/A	0.775026	0
SEC23B	N/A	N/A	0.775026	0
SLC12A6	N/A	N/A	0.775026	0
SLC48A1	N/A	N/A	0.775026	0
SPRED2	N/A	N/A	0.775026	0
STAR	N/A	N/A	0.775026	0
STAT4	0.243	N/A	0.775026	0
STK26	N/A	N/A	0.775026	0
STX6	N/A	N/A	0.775026	0
TMEM106B	N/A	N/A	0.775026	0
TRMT13	N/A	N/A	0.775026	0
TUBB1	N/A	N/A	0.775026	0
VEZF1	N/A	N/A	0.775026	0
WNT5A	-0.022	N/A	0.775026	0
YAP1-TEAD inhibitor peptide 17	N/A	N/A	0.775026	0
sorafenib	N/A	N/A	0.772011	0
tetrandrine	N/A	N/A	0	0.771289
CUL3	N/A	-1.964	0	0.768128
Akt	N/A	-0.972	0	0.765837
desmopressin	N/A	0	0	0.765837
JUP	N/A	N/A	0	0.765837
pyrimidin-2-one beta-ribofuranoside	N/A	N/A	0	0.765837
SAMMSON	N/A	-1.342	0	0.765837
SPTBN1	N/A	N/A	0	0.765837
calphostin C	N/A	N/A	0.759235	0
HSP90AB1	N/A	N/A	0.759235	0
lipofermata	N/A	N/A	0.759235	0
SDCBP	N/A	N/A	0.759235	0
SFN	N/A	N/A	0.759235	0
XIAP	N/A	N/A	0.759235	0
ZNF507	N/A	N/A	0.759235	0
HIF1A	0.791	N/A	0.751314	0
bromobenzene	N/A	N/A	0.750804	0
Fus	N/A	N/A	0.750804	0
LDHA	N/A	N/A	0.750804	0
sunitinib	N/A	N/A	0.750804	0
miR-124-3p (and other miRNAs w/seed AAGGCAC)	-0.034	N/A	0.750435	0
DSCAM	N/A	-1.414	0	0.747221
DDX21	N/A	N/A	0	0.744582
Dlx6os1	N/A	N/A	0	0.744582
GNG13	N/A	N/A	0	0.744582
1-methyl-4-phenylpyridinium	N/A	N/A	0.742623	0
galactose	N/A	N/A	0.742623	0
PG3-Oc	N/A	N/A	0.742623	0
let-7	-0.862	N/A	0.742062	0
PIAS1	N/A	-0.378	0	0.737082
1,5-dihydroxyisoquinoline	N/A	N/A	0.731809	0
2-[[4-[(e)-styryl]phenoxy]methyl]oxirane	N/A	N/A	0.731809	0
AKAP13	N/A	N/A	0.731809	0
AKT3	N/A	N/A	0.731809	0
artesunic acid	N/A	N/A	0.731809	0
ARTN	N/A	N/A	0.731809	0
AZD-1208	N/A	N/A	0.731809	0
BACH2	N/A	N/A	0.731809	0
BAIAP2L1	N/A	N/A	0.731809	0
CASP3	N/A	N/A	0.731809	0
CD55	N/A	N/A	0.731809	0
CIL56	N/A	N/A	0.731809	0
CTSL	N/A	N/A	0.731809	0
cyclosporin A	-0.969	N/A	0.731809	0
CYP11B2	N/A	N/A	0.731809	0
CYP4V2	N/A	N/A	0.731809	0
diamide	N/A	N/A	0.731809	0
DIAPH3	N/A	N/A	0.731809	0
dithiothreitol	N/A	N/A	0.731809	0
DNMT3A	0.152	N/A	0.731809	0
DPYSL2	N/A	N/A	0.731809	0
EIF2B5	N/A	N/A	0.731809	0
FAS	N/A	N/A	0.731809	0
FECH	N/A	N/A	0.731809	0
FGD5-AS1	N/A	N/A	0.731809	0
G0S2	N/A	N/A	0.731809	0
gemcabene	N/A	N/A	0.731809	0
GLIPR2	N/A	N/A	0.731809	0
glucuronyl glucosamine glycan sulfate	N/A	N/A	0.731809	0
goserelin	N/A	N/A	0.731809	0
GW3965	0.894	N/A	0.731809	0
HOXA-AS3	N/A	N/A	0.731809	0
Hyaluronidase	N/A	N/A	0.731809	0
KAT2A	2	N/A	0.731809	0
LAMB2	N/A	N/A	0.731809	0
LMNA	N/A	N/A	0.731809	0
LOX	N/A	N/A	0.731809	0
LPIN1	N/A	N/A	0.731809	0
methotrexate	N/A	N/A	0.731809	0
methyl cellosolve	N/A	N/A	0.731809	0
mir-134	N/A	N/A	0.731809	0
mir-138	N/A	N/A	0.731809	0
mir-184	N/A	N/A	0.731809	0
ML221	N/A	N/A	0.731809	0
ML264	N/A	N/A	0.731809	0
napabucasin	N/A	N/A	0.731809	0
NBR2	N/A	N/A	0.731809	0
NU-7026	N/A	N/A	0.731809	0
PCCA-DT	N/A	N/A	0.731809	0
PDE1C	N/A	N/A	0.731809	0
PDLIM1	N/A	N/A	0.731809	0
PF-4691502	N/A	N/A	0.731809	0
POLR1HASP	N/A	N/A	0.731809	0
Prl3d1 (includes others)	N/A	N/A	0.731809	0
RHBDD1	N/A	N/A	0.731809	0
Rhox5	N/A	N/A	0.731809	0
SF2523	N/A	N/A	0.731809	0
SLC1A5	N/A	N/A	0.731809	0
streptozocin	-1.123	N/A	0.731809	0
TAS-103	N/A	N/A	0.731809	0
TBP	N/A	N/A	0.731809	0
tipifarnib	N/A	N/A	0.731809	0
TLCD3A	N/A	N/A	0.731809	0
TMPRSS2-ERG	0.305	N/A	0.731809	0
TRDN	N/A	N/A	0.731809	0
TUSC3	N/A	N/A	0.731809	0
UMI-77	N/A	N/A	0.731809	0
carbon tetrachloride	1.503	N/A	0.731554	0
methylselenic acid	N/A	N/A	0.731554	0
FOXO1	N/A	0.169	0	0.731161
HIPK2	N/A	N/A	0.730472	0
grape seed extract	N/A	N/A	0.730099	0
letrozole	N/A	N/A	0.730099	0
XRCC5	N/A	N/A	0.730099	0
SLC27A2	N/A	0.391	0	0.718701
AF-2364	N/A	N/A	0	0.71236
COP1	N/A	N/A	0.70934	0
ICMT	N/A	N/A	0.70934	0
mir-124	N/A	N/A	0.70934	0
miR-199a-3p (and other miRNAs w/seed CAGUAGU)	N/A	N/A	0.70934	0
PAX2	N/A	N/A	0.70934	0
estrogen receptor	0.555	N/A	0.705458	0
progesterone	0.919	N/A	0.705458	0
IL4R	N/A	0	0	0.698377
FGF21	N/A	N/A	0.698369	0
(-)-gossypol	N/A	N/A	0.696271	0
1-Naphthalenesulfonyl-IW-CHO	N/A	N/A	0.696271	0
4-hydroxy-N-desmethyltamoxifen	N/A	N/A	0.696271	0
ACSL6	N/A	N/A	0.696271	0
AF8c	N/A	N/A	0.696271	0
AKT1S1	N/A	N/A	0.696271	0
ARLNC1	N/A	N/A	0.696271	0
ATP5PO	N/A	N/A	0.696271	0
BDNF-AS	N/A	N/A	0.696271	0
BUD23	N/A	N/A	0.696271	0
carvacrol	N/A	N/A	0.696271	0
CEBPB	0.308	N/A	0.696271	0
dimethyl succinate	N/A	N/A	0.696271	0
DLGAP1	N/A	N/A	0.696271	0
docetaxel	0.747	N/A	0.696271	0
ENHO	N/A	N/A	0.696271	0
EZH2	-1.118	N/A	0.696271	0
FAM120B	N/A	N/A	0.696271	0
FICD	N/A	N/A	0.696271	0
FIIN-2	N/A	N/A	0.696271	0
FLVCR1	N/A	N/A	0.696271	0
FUT4	N/A	N/A	0.696271	0
gefitinib	N/A	N/A	0.696271	0
GSK3B	1.114	N/A	0.696271	0
heparin	N/A	N/A	0.696271	0
INSL5	N/A	N/A	0.696271	0
JV-1-65 hGHRH(1-29)NH2	N/A	N/A	0.696271	0
KAT5	-0.218	N/A	0.696271	0
KIF26B	N/A	N/A	0.696271	0
L-buthionine (SR)-sulfoximine	N/A	N/A	0.696271	0
LINC00887	N/A	N/A	0.696271	0
LSP1	N/A	N/A	0.696271	0
lunasin	N/A	N/A	0.696271	0
Macf1	N/A	N/A	0.696271	0
MAOA	N/A	N/A	0.696271	0
MCM10	N/A	N/A	0.696271	0
MILIP	N/A	N/A	0.696271	0
miR-23a-3p (and other miRNAs w/seed UCACAUU)	N/A	N/A	0.696271	0
miR-382-5p (miRNAs w/seed AAGUUGU)	N/A	N/A	0.696271	0
miR-423-5p inhibitor	N/A	N/A	0.696271	0
miR-508-3p (miRNAs w/seed GAUUGUA)	N/A	N/A	0.696271	0
miR-615-5p (and other miRNAs w/seed GGGGUCC)	N/A	N/A	0.696271	0
N-Ac-Leu-Leu-norleucinal	N/A	N/A	0.696271	0
niraparib	N/A	N/A	0.696271	0
NME3	N/A	N/A	0.696271	0
NSRP1	N/A	N/A	0.696271	0
NUP133	N/A	N/A	0.696271	0
omacetaxine mepesuccinate	N/A	N/A	0.696271	0
orantinib	N/A	N/A	0.696271	0
oxaliplatin	N/A	N/A	0.696271	0
P5091	N/A	N/A	0.696271	0
PENK	N/A	N/A	0.696271	0
pergolide	N/A	N/A	0.696271	0
PFN1	N/A	N/A	0.696271	0
PLCB4	N/A	N/A	0.696271	0
POR	N/A	N/A	0.696271	0
SD-282	N/A	N/A	0.696271	0
SH3GLB1	N/A	N/A	0.696271	0
SRSF6	N/A	N/A	0.696271	0
SUZ12	N/A	N/A	0.696271	0
tauromuricholic acid	N/A	N/A	0.696271	0
THBS4	N/A	N/A	0.696271	0
tyrphostin 25	N/A	N/A	0.696271	0
WAKMAR1	N/A	N/A	0.696271	0
XAF1	N/A	N/A	0.696271	0
ZBTB7A	N/A	N/A	0.696271	0
asoprisnil	N/A	N/A	0.695892	0
CDC42	N/A	N/A	0.695892	0
DCLK1	N/A	N/A	0.695892	0
HSPG2	N/A	N/A	0.695892	0
LONP1	N/A	N/A	0.695892	0
mercuric chloride	N/A	N/A	0.695892	0
NGLY1	N/A	N/A	0.695892	0
TERT	N/A	N/A	0.6947	0
EIF3E	N/A	0.391	0	0.687888
ASPSCR1-TFE3	N/A	-0.707	0	0.681746
xanthine derivative CB002 analog 4	N/A	0	0	0.676411
pirinixic acid	N/A	-2.396	0	0.647019
BML-284	N/A	N/A	0	0.644242
GP7	N/A	N/A	0	0.644242
GPR174	N/A	0.707	0	0.644242
HNRNPH1	N/A	N/A	0	0.644242
Integrin alpha 4 beta 1	N/A	N/A	0	0.644242
NOCT	N/A	N/A	0	0.644242
PSMB5	N/A	N/A	0	0.644242
SAG	N/A	N/A	0	0.644242
vaccenic acid	N/A	N/A	0	0.644242
ZNF207	N/A	N/A	0	0.644242
zonisamide	N/A	N/A	0	0.644242
MYO6	N/A	-0.378	0	0.633427
PSEN2	N/A	0.126	0	0.632807
TCR	N/A	-0.242	0	0.632807
PML	N/A	0.323	0	0.631871
interferon beta-1a	N/A	N/A	0	0.628919
FITM2	N/A	N/A	0	0.624254
NO 1886	N/A	N/A	0	0.624254
fluoxetine	N/A	0.59	0	0.623775
LARP1	N/A	1.134	0	0.623775
valproic acid	N/A	0.155	0	0.615183
(-)-gossypol-enriched cottonseed oil	N/A	N/A	0	0.612737
(+)-terpinen-4-ol	N/A	N/A	0	0.612737
144DG11	N/A	-0.816	0	0.612737
1-aminoindan	N/A	N/A	0	0.612737
1-benzyl-2-phenylbenzimidazole	N/A	N/A	0	0.612737
2,2-dichloroacetophenone	N/A	N/A	0	0.612737
26s Proteasome	N/A	0.976	0	0.612737
3,4-dideoxyglucosone-3-ene	N/A	N/A	0	0.612737
3-deazaneplanocin	N/A	-0.647	0	0.612737
4-(3',5'-dimethoxybenzyloxy)-6-methoxyquinolin-2(1H)-one	N/A	N/A	0	0.612737
4-methoxyhonokiol	N/A	N/A	0	0.612737
6-azidomethyl-1-hydroxy-3,8-dimethoxy-9,10-anthraquinone	N/A	N/A	0	0.612737
7,8-dihydroxy-4-methylcoumarin	N/A	N/A	0	0.612737
8-hydrocalamenene	N/A	N/A	0	0.612737
AB1	N/A	N/A	0	0.612737
ABI2	N/A	N/A	0	0.612737
ABL2	N/A	N/A	0	0.612737
acetylapoaranotin	N/A	N/A	0	0.612737
acetylaranotin	N/A	N/A	0	0.612737
ADARB1	N/A	N/A	0	0.612737
ADCYAP1	N/A	0.927	0	0.612737
agar	N/A	N/A	0	0.612737
aloin	N/A	N/A	0	0.612737
alpha-ketobutyric acid	N/A	N/A	0	0.612737
alpha-tocotrienol/beta-tocotrienol/delta-tocotrienol/gamma-tocotrienol	N/A	N/A	0	0.612737
alpinetin	N/A	N/A	0	0.612737
ANGPTL8	N/A	N/A	0	0.612737
anlotinib	N/A	N/A	0	0.612737
anti-miR-886-3p	N/A	N/A	0	0.612737
ASB9	N/A	N/A	0	0.612737
asciminib	N/A	-0.849	0	0.612737
ATF6	N/A	-1.387	0	0.612737
atractylenolide I	N/A	N/A	0	0.612737
AUH-6-96	N/A	N/A	0	0.612737
BACH1	N/A	-1.633	0	0.612737
barasertib	N/A	N/A	0	0.612737
BAY1082439	N/A	N/A	0	0.612737
BCR-JAK2	N/A	N/A	0	0.612737
berbamine	N/A	N/A	0	0.612737
beta,beta-dimethylacrylalkannin	N/A	N/A	0	0.612737
bicuculline/dalfampridine	N/A	N/A	0	0.612737
bicyclol	N/A	N/A	0	0.612737
bisindole-linked pyrrolo[2,1-c][1,4]benzodiazepine 5b	N/A	N/A	0	0.612737
BMPR2	N/A	0	0	0.612737
BMS-690514	N/A	-1	0	0.612737
bornyl caffeate	N/A	N/A	0	0.612737
budesonide	N/A	-2	0	0.612737
carbon	N/A	N/A	0	0.612737
cardiotoxin III	N/A	N/A	0	0.612737
CD40	N/A	2.39	0	0.612737
Cd99	N/A	N/A	0	0.612737
CDC42BPB	N/A	N/A	0	0.612737
ceruletide	N/A	-2.121	0	0.612737
CHMP4C	N/A	N/A	0	0.612737
cicletanine	N/A	N/A	0	0.612737
CIP2A	N/A	0.816	0	0.612737
Ck2	N/A	N/A	0	0.612737
CLK1	N/A	N/A	0	0.612737
CLK4	N/A	N/A	0	0.612737
CLPTM1L	N/A	N/A	0	0.612737
CPS49	N/A	N/A	0	0.612737
CXCR1	N/A	N/A	0	0.612737
deoxyapoaranotin	N/A	N/A	0	0.612737
dianthus chinensis l. ethanol extract	N/A	N/A	0	0.612737
dimethyl sulfate	N/A	N/A	0	0.612737
DIO3OS	N/A	N/A	0	0.612737
diquat	N/A	N/A	0	0.612737
DT-061	N/A	N/A	0	0.612737
EAPB0203	N/A	N/A	0	0.612737
EIF4A3	N/A	N/A	0	0.612737
EPO	N/A	-0.019	0	0.612737
ezogabine	N/A	N/A	0	0.612737
FAAH	N/A	N/A	0	0.612737
farnesiferol C	N/A	N/A	0	0.612737
FK-962	N/A	N/A	0	0.612737
flacourtia indica methanol extract	N/A	N/A	0	0.612737
forskolin	N/A	0.116	0	0.612737
fungal taxol	N/A	N/A	0	0.612737
G protein q	N/A	N/A	0	0.612737
galiximab	N/A	N/A	0	0.612737
GAMT	N/A	N/A	0	0.612737
gastric acid	N/A	N/A	0	0.612737
glutamine	N/A	N/A	0	0.612737
glycan	N/A	N/A	0	0.612737
Gm13570/Gm4984	N/A	N/A	0	0.612737
Gm17251	N/A	N/A	0	0.612737
G-protein beta	N/A	N/A	0	0.612737
G-protein gamma	N/A	N/A	0	0.612737
GSK0660	N/A	N/A	0	0.612737
GW 5074	N/A	N/A	0	0.612737
gypenoside	N/A	N/A	0	0.612737
H9 extract	N/A	N/A	0	0.612737
hederagenin	N/A	N/A	0	0.612737
heteronemin	N/A	N/A	0	0.612737
HNRNPA2B1	N/A	N/A	0	0.612737
holothurian glycosaminoglycan	N/A	N/A	0	0.612737
HRG	N/A	N/A	0	0.612737
HSF2	N/A	-0.762	0	0.612737
hydroxyaminoindan	N/A	N/A	0	0.612737
Il2 beta gamma receptor	N/A	N/A	0	0.612737
IL3	N/A	-0.611	0	0.612737
inosine	N/A	-0.447	0	0.612737
INSR	N/A	0.614	0	0.612737
iodine-131	N/A	N/A	0	0.612737
JOT01006	N/A	N/A	0	0.612737
KCTD10	N/A	N/A	0	0.612737
KH-CB19	N/A	N/A	0	0.612737
korean red ginseng extract	N/A	N/A	0	0.612737
L744832	N/A	N/A	0	0.612737
Lectin	N/A	N/A	0	0.612737
let-7c mimic	N/A	N/A	0	0.612737
LINC00570	N/A	N/A	0	0.612737
liriope platyphylla root part extract	N/A	N/A	0	0.612737
LMX1A	N/A	N/A	0	0.612737
LOC100912227	N/A	N/A	0	0.612737
luffa echinata roxb fruit extract	N/A	N/A	0	0.612737
lymphokine	N/A	N/A	0	0.612737
mansonone E	N/A	N/A	0	0.612737
MAP4K4	N/A	0	0	0.612737
MAPK substrate-4	N/A	N/A	0	0.612737
MBNL2	N/A	N/A	0	0.612737
MCM8	N/A	N/A	0	0.612737
melamine	N/A	N/A	0	0.612737
methamphetamine	N/A	1.049	0	0.612737
methapyrilene	N/A	N/A	0	0.612737
miR-135a mimic	N/A	N/A	0	0.612737
miR-210-3p (miRNAs w/seed UGUGCGU)	N/A	N/A	0	0.612737
mir-28	N/A	N/A	0	0.612737
miR-293-5p (and other miRNAs w/seed CUCAAAC)	N/A	N/A	0	0.612737
miR-3584-5p (and other miRNAs w/seed GGAGGAG)	N/A	N/A	0	0.612737
miR-454-3p inhibitor	N/A	N/A	0	0.612737
miR-454-3p mimic	N/A	N/A	0	0.612737
miR-4651 (and other miRNAs w/seed GGGGUGG)	N/A	N/A	0	0.612737
mir-491	N/A	N/A	0	0.612737
miR-491-5p (and other miRNAs w/seed GUGGGGA)	N/A	N/A	0	0.612737
mir-499	N/A	N/A	0	0.612737
mir-515	N/A	N/A	0	0.612737
MLN7243	N/A	N/A	0	0.612737
morusin	N/A	N/A	0	0.612737
MPT0B169	N/A	N/A	0	0.612737
MPT0G009	N/A	N/A	0	0.612737
MTX2	N/A	N/A	0	0.612737
MYCBP2	N/A	N/A	0	0.612737
MYCL	N/A	-0.342	0	0.612737
N-[3-(trifluoromethyl)phenyl]retinamide	N/A	N/A	0	0.612737
nardostachys chinensis extract	N/A	N/A	0	0.612737
nicotinamide adenine dinucleotide phosphate	N/A	N/A	0	0.612737
nimustine	N/A	N/A	0	0.612737
nitidine	N/A	N/A	0	0.612737
nitroaspirin	N/A	N/A	0	0.612737
N-methyl-3,4-methylenedioxyamphetamine	N/A	N/A	0	0.612737
nocodazole	N/A	0.956	0	0.612737
NPAS1	N/A	N/A	0	0.612737
NRXN2	N/A	N/A	0	0.612737
Nrxn3	N/A	N/A	0	0.612737
NuRD	N/A	N/A	0	0.612737
omeprazole	N/A	N/A	0	0.612737
OPRL1	N/A	N/A	0	0.612737
paclitaxel	N/A	-0.588	0	0.612737
PAIP2	N/A	N/A	0	0.612737
PARP3	N/A	N/A	0	0.612737
p-cuminaldehyde	N/A	N/A	0	0.612737
PDE1A	N/A	N/A	0	0.612737
PDK1	N/A	-0.128	0	0.612737
pepleomycin	N/A	N/A	0	0.612737
persea declinata (bl.) kosterm bark methanolic crude extract	N/A	N/A	0	0.612737
PFKP	N/A	N/A	0	0.612737
picolog	N/A	N/A	0	0.612737
pien tze huang methanol extract	N/A	N/A	0	0.612737
PIWIL2	N/A	N/A	0	0.612737
PPARD	N/A	0.211	0	0.612737
PPOX	N/A	N/A	0	0.612737
procyanidin B2-3,3'-di-O-gallate	N/A	N/A	0	0.612737
procyanidin B2-3'-O-gallate	N/A	N/A	0	0.612737
propargylamine	N/A	N/A	0	0.612737
propylthiouracil	N/A	1.242	0	0.612737
PRT4165	N/A	N/A	0	0.612737
pseudolaric acid B	N/A	N/A	0	0.612737
PSMA1	N/A	N/A	0	0.612737
raddeanin A	N/A	N/A	0	0.612737
Rap	N/A	N/A	0	0.612737
RARS1	N/A	N/A	0	0.612737
rasagiline	N/A	0.641	0	0.612737
RBM25	N/A	N/A	0	0.612737
REG1A	N/A	N/A	0	0.612737
REG4	N/A	N/A	0	0.612737
Rho gdi	N/A	N/A	0	0.612737
RIC8B	N/A	N/A	0	0.612737
RND2	N/A	N/A	0	0.612737
RNPS1	N/A	N/A	0	0.612737
rocaglaol	N/A	N/A	0	0.612737
RPL34-DT	N/A	N/A	0	0.612737
RRAS	N/A	N/A	0	0.612737
SAIT301	N/A	N/A	0	0.612737
sepantronium	N/A	N/A	0	0.612737
SGC (family)	N/A	N/A	0	0.612737
SH2D5	N/A	N/A	0	0.612737
silmitasertib	N/A	N/A	0	0.612737
SLC25A4	N/A	N/A	0	0.612737
SNX5	N/A	N/A	0	0.612737
solamargine	N/A	N/A	0	0.612737
SPI-112Me	N/A	N/A	0	0.612737
SRC	N/A	1.116	0	0.612737
SRPK1	N/A	N/A	0	0.612737
ST8SIA1	N/A	N/A	0	0.612737
STRA8	N/A	0	0	0.612737
subditine	N/A	N/A	0	0.612737
sun ginseng extract	N/A	N/A	0	0.612737
SYP	N/A	N/A	0	0.612737
SYVN1	N/A	0	0	0.612737
T-5224	N/A	-0.707	0	0.612737
TCEAL7	N/A	N/A	0	0.612737
tetraacetyl-phytosphingosine	N/A	N/A	0	0.612737
tetracaine	N/A	N/A	0	0.612737
Timp	N/A	N/A	0	0.612737
tinostamustine	N/A	N/A	0	0.612737
TKT	N/A	N/A	0	0.612737
TL-77	N/A	N/A	0	0.612737
TLE3	N/A	N/A	0	0.612737
TNFAIP8L1	N/A	N/A	0	0.612737
TNFSF11	N/A	-1.094	0	0.612737
TRAPPC9	N/A	N/A	0	0.612737
tributyltin	N/A	-1.414	0	0.612737
TRV-AAC/CAC with 3' ACCGGGCGGAAACA	N/A	N/A	0	0.612737
TSHZ3	N/A	1.362	0	0.612737
TTL	N/A	N/A	0	0.612737
uncarinic acid E	N/A	N/A	0	0.612737
WJ9708012	N/A	N/A	0	0.612737
WNT16	N/A	N/A	0	0.612737
XBP1	N/A	-0.32	0	0.612737
zinc-citrate	N/A	N/A	0	0.612737
ZM 323881	N/A	N/A	0	0.612737
ZNF263	N/A	N/A	0	0.612737
zuo-jin-wan	N/A	N/A	0	0.612737
mir-218	N/A	N/A	0	0.601022
PHLPP1	N/A	N/A	0	0.601022
RGS2	N/A	-1.134	0	0.601022
TSPYL5	N/A	N/A	0	0.601022
ZNF148	N/A	N/A	0	0.601022
AR	N/A	-1.446	0	0.58209
10-hydroxycamptothecin	N/A	N/A	0	0.567977
CLDN7	N/A	0.677	0	0.567977
CRNDE	N/A	-1	0	0.567977
cysteamine	N/A	N/A	0	0.567977
DYRK1A	N/A	N/A	0	0.567977
GRM5	N/A	N/A	0	0.567977
LINC01139	N/A	N/A	0	0.567977
miR-138-5p (miRNAs w/seed GCUGGUG)	N/A	N/A	0	0.567977
miR-142-3p (and other miRNAs w/seed GUAGUGU)	N/A	N/A	0	0.567977
mir-483	N/A	N/A	0	0.567977
RANBP3L	N/A	1.342	0	0.567977
RANBP9	N/A	N/A	0	0.567977
RNF138	N/A	N/A	0	0.567977
SEMA3A	N/A	N/A	0	0.567977
SGPL1	N/A	N/A	0	0.567977
temsirolimus	N/A	N/A	0	0.567977
TSC2	N/A	1.541	0	0.567977
SNAI1	N/A	0.152	0	0.555566
HIC1	N/A	-1.342	0	0.546362
LAS1L	N/A	-0.447	0	0.546362
LDHB	N/A	N/A	0	0.535333
PCYT1A	N/A	N/A	0	0.535333
UCN-01	N/A	N/A	0	0.535333
fatty acid	N/A	-2.219	0	0.523277
pituitary adenylate cyclase-activating polypeptide	N/A	N/A	0	0.51647
3-deazaadenosine	N/A	N/A	0	0.512177
AR7	N/A	N/A	0	0.512177
Histone h4	N/A	N/A	0	0.512177
HULC	N/A	N/A	0	0.512177
LRPPRC	N/A	N/A	0	0.512177
miR-541-5p (miRNAs w/seed AGGGAUU)	N/A	N/A	0	0.512177
RBFOX2	N/A	N/A	0	0.512177
TBC1D1	N/A	N/A	0	0.512177
Tetanospasmin	N/A	N/A	0	0.512177
WNT10B	N/A	N/A	0	0.512177
FBXO32	N/A	-0.816	0	0.507956
ammonium chloride	N/A	N/A	0	0.506085
beta-galactosidase	N/A	N/A	0	0.506085
miR-128-3p (and other miRNAs w/seed CACAGUG)	N/A	N/A	0	0.506085
SLC2A4	N/A	N/A	0	0.506085
I-BET-151	N/A	0	0	0.499572
NFU1	N/A	N/A	0	0.499572
AGN194204	N/A	-1.732	0	0.497709
BIX 01294	N/A	N/A	0	0.495611
caffeic acid phenethyl ester	N/A	-1.153	0	0.495611
CD28	N/A	0.104	0	0.495611
DNMT1	N/A	N/A	0	0.495611
ERRFI1	N/A	N/A	0	0.495611
FBXW7	N/A	0	0	0.495611
HAX1	N/A	0	0	0.495611
K-252	N/A	N/A	0	0.495611
miR-409-3p (miRNAs w/seed AAUGUUG)	N/A	N/A	0	0.495611
NCKAP1L	N/A	N/A	0	0.495611
NME1	N/A	N/A	0	0.495611
ouabain	N/A	N/A	0	0.495611
phenethyl isothiocyanate	N/A	N/A	0	0.495611
Pka catalytic subunit	N/A	N/A	0	0.495611
TOP1	N/A	N/A	0	0.495611

## Sheet: Behavior prediction
© 2000-2024 QIAGEN. All rights reserved.	z-score	z-score	BH pvalue	BH pvalue
Diseases and Bio Functions	CX_Global (AGE vs controls) - 2023-07-01 03:17 PM	Hippo_Global (AGE vs controls) - 2023-07-01 03:19 PM	CX_Global (AGE vs controls) - 2023-07-01 03:17 PM	Hippo_Global (AGE vs controls) - 2023-07-01 03:19 PM
Cognition	0.755	-0.292	2.59917	12.8838
Learning	1.056	-0.297	2.35036	13.4466
Fear	N/A	N/A	2.28646	0
Locomotion	N/A	-0.644	0	8.55704
Anxiety	N/A	0.427	0	6.70931
Conditioning	N/A	0.915	0	6.08031
Contextual conditioning	N/A	0.788	0	5.92814
Memory	N/A	-1.937	0	5.64463
Emotional behavior	N/A	-0.941	0	5.62112
Spatial memory	N/A	-0.478	0	5.15679
Spatial learning	N/A	2.97	0	5.15068
Object recognition memory	N/A	-0.555	0	4.16415
Social exploration	N/A	N/A	0	4.0781
Cued conditioning	N/A	0	0	3.8359
Exploratory behavior	N/A	0.262	0	3.63556
Nest building behavior	N/A	N/A	0	3.52394
Recognition memory	N/A	-1.195	0	3.42239
Aggressive behavior	N/A	-0.653	0	3.37784
Anxiety-like behavior	N/A	-0.885	0	3.29407
Vocalization	N/A	0.468	0	3.26987
Associative learning	N/A	N/A	0	2.96253
Movement of rodents	N/A	N/A	0	2.91463
Vertical rearing	N/A	-0.508	0	2.72472
Aggressive behavior toward mice	N/A	0	0	2.67068
Energy homeostasis	N/A	0.58	0	2.50299
Hypoactivity of mice	N/A	N/A	0	2.45583
Abnormal emotional behavior	N/A	N/A	0	2.33
Lifespan of organism	N/A	0.865	0	1.79622
Visual acuity	N/A	N/A	0	1.78378
Self-grooming	N/A	N/A	0	1.63109
Social behavior	N/A	-0.878	0	1.61786
Hyperactivity	N/A	N/A	0	1.60796
Grasping	N/A	N/A	0	1.55463
Locomotor activity	N/A	N/A	0	1.54363
Motor learning	N/A	N/A	0	1.47628
Grooming	N/A	0.534	0	1.45154
